1 **Scientometric correlates of high-quality reference lists in ecological papers**

2

3 Stefano Mammola<sup>1,2,\*</sup>, Diego Fontaneto<sup>1</sup>, Alejandro Martínez<sup>1</sup>, Filipe Chichorro<sup>2</sup>

4

5 1. Molecular Ecology Group (MEG), IRSA – Water Research Institute, National Research Council, Verbania  
6 Pallanza, Italy

7 2. Laboratory for Integrative Biodiversity Research (LIBRe), Finnish Museum of Natural History (LUOMUS),  
8 University of Helsinki, Finland

9

10 \* corresponding author: [stefano.mammola@cnr.it](mailto:stefano.mammola@cnr.it)

11 **Abstract**

12 It is said that the quality of a scientific publication is as good as the science it cites, but the  
13 properties of high-quality reference lists have never been numerically quantified. We  
14 examined seven numerical characteristics of reference lists of 50,878 primary research  
15 articles published in 17 ecological journals between 1997 and 2017. Over this 20-years  
16 period, there have been significant changes in reference lists' properties. On average,  
17 more recent ecological papers have longer reference lists, cite more high Impact Factor  
18 papers, and fewer non-journal publications. Furthermore, we show that highly cited papers  
19 across the ecology literature have longer reference lists, cite more recent and impactful  
20 papers, and account for more self-citations. Conversely, the proportion of 'classic' papers  
21 and non-journal publications cited, as well as the temporal range of the reference list, have  
22 no significant influence on articles' citations. From this analysis, we distill a recipe for  
23 crafting impactful reference lists.

24

25 **Keywords:** Bibliography, Bibliometrics, Citations, Classic paper, Impact factor, Reference  
26 list, Scientometrics

## 27 **Introduction**

28 As young scientists moving our first steps in the world of academic publishing, we were  
29 instructed by our mentors and supervisors on the articles to read and cite in our  
30 publications. “Avoid self-citations”, “Include as many papers published in *Nature* and  
31 *Science* as possible”, “Don’t forget the classics”, and “Be timely! Cite recent papers” are all  
32 examples of such advices found in textbooks and blogs about scientific writing. Yet, to the  
33 best of our knowledge, intrinsic properties of high-quality reference lists have never been  
34 numerically quantified.

35 The success of a scientific publication varies owing to a range of factors, often  
36 acting synergistically in driving its impact. Apart from the scientific content of the article  
37 itself, which ideally should be the only predictor of its impact, factors that correlate to the  
38 number of citations that an article accumulates over time include its accessibility <sup>1,2</sup>, the  
39 stylistic characteristics of its title <sup>3-5</sup> and abstract <sup>6</sup>, the number of authors <sup>7</sup>, and its  
40 availability as a preprint <sup>8</sup>. Furthermore, it is understood that the quality of a scientific  
41 publication should be related to the quality of the science it cites, but quantitative evidence  
42 for this remains sparse <sup>7,9-11</sup>.

43 From a theoretical point of view, a reference list of high quality should be a  
44 balanced and comprehensive selection of up-to-date references, capable of providing a  
45 snapshot of the intellectual ancestry supporting the novel findings presented in a given  
46 article <sup>12</sup>. This is achieved by conducting a systematic retrospective search to select all  
47 papers with content that is strongly related to that of the article, to be read and potentially  
48 cited if deemed relevant. The most thorough and recent attempt to evaluate the quality  
49 and properties of a journal article reference list was made by Evans <sup>9</sup>. Using a database of  
50 >30 million journal articles from 1945 to 2006 Evans showed that, over time, there has  
51 been a general trend to referencing more recent articles, channelling citations toward  
52 fewer journals and articles, and shortening the length of the reference list. Evans predicted

53 that this way of citing papers “[...] *may accelerate consensus and narrow the range of*  
54 *findings and ideas built upon*”, an observation that generated subsequent debate <sup>13–15</sup>. For  
55 example, in a heated reply to Evan’s report, Von Bartheld et al. <sup>13</sup> argued that this claim  
56 was speculative because “[...] *citation indices do not distinguish the purposes of citations*”.  
57 In their view, one should consider the ultimate purpose of each individual citation and the  
58 motivation of authors when they decided which papers to cite.

59 Yet, it is challenging to disentangle all factors driving an author choice of citing one  
60 or another reference <sup>11,16</sup>, especially when dealing with large bibliometric databases such  
61 as the one used by Evans <sup>9</sup> to draw his conclusions. In spite of the attempts made, the  
62 question remains as to how to objectively evaluate the quality and properties of a  
63 reference list. To address this gap, we extracted from Web of Science (Clarivate Analytics)  
64 all primary research journal articles published in low- to high-rank international journals in  
65 ecology in the last 20 years, and generated unique descriptors of their reference lists. We  
66 restricted our analysis to articles published in international journals in “Ecology” because,  
67 by focusing on a single discipline, it was possible to minimize the number of confounding  
68 factors. Moreover, this choice allowed us to incorporate in the analyses a unique descriptor  
69 of the reference list based on an analysis published in 2018 on seminal papers in ecology  
70 <sup>17</sup> (see “Seminality index” in Table 1).

71 We structured this research under two working hypotheses. First, if the quality of a  
72 scientific paper is connected to the reference it cites, we predict that, on average, articles  
73 characterized by a good reference list should accumulate more citations over time, where  
74 the goodness of a reference list is approximated via a combination of different indexes  
75 (Table 1). Second, we hypothesize that thanks to modern searching tools such as large  
76 online databases, bibliographic portals, and hyperlinks, the behavior through which  
77 scientists craft their reference lists should have change in the Internet era <sup>15,18</sup>. Thus, we

78 predict that this change should be reflected by variations through time in the proprieties of  
 79 articles' reference lists.

80

81 **Table 1.** Proxy variables used to characterized the reference list of the papers.

| Variable                                       | Description                                                                                                | Construction                                                                                                                                                                                                                      | Type       |
|------------------------------------------------|------------------------------------------------------------------------------------------------------------|-----------------------------------------------------------------------------------------------------------------------------------------------------------------------------------------------------------------------------------|------------|
| Length                                         | Total number of reference items cited in the paper reference list.                                         | Sum of reference items cited (variable "NR" in WoS database).                                                                                                                                                                     | Real value |
| non-ISI papers (non-journal publication cited) | Number of non-ISI items cited in the reference list, such as books, theses, websites, and grey literature. | Number of non-journal items cited divided by Length.                                                                                                                                                                              | Proportion |
| Self-citations                                 | Number of self-citations in the reference list.                                                            | Number of self-citations divided by Length.<br>Note that only first author self-citations are counted, namely those in which any of the authors of the paper appear as first author in items of the reference list.               | Proportion |
| Temporal span                                  | Temporal span of the reference list.                                                                       | Year of most recent reference item cited – year of oldest item cited.                                                                                                                                                             | Real value |
| Immediacy                                      | Number of recent reference items cited.                                                                    | Number of papers published in the previous three years divided by Length.                                                                                                                                                         | Proportion |
| Seminality                                     | Number of seminal ecological papers cited                                                                  | Number of cited items in the list " <i>100 articles every ecologist should read</i> " <sup>17</sup> divided by Length.                                                                                                            | Proportion |
| Total IF                                       | Sum of the IF values of all the reference cited in the paper.                                              | Total IF is calculated using the JIF of each reference at the year of publication, based on annual JCRs. To calculate the proportion, Total IF is divided by the number of reference with JIF (Length – number of non-ISI items). | Proportion |

82

83 IF= Impact Factor; ISI= International Scientific Indexing; JCR= Journal Citation Reports; JIF= Impact Factor; WoS= Web of Science

84 **Results**

85 *Reference list characteristics in ecology*

86 After excluding non-primary research articles and omitting incomplete WoS records, we  
87 ended up with 50,878 unique papers distributed across the 17 journals that covered the  
88 time span from 1997 to 2017. The median size of the reference list in ecological journals is  
89 54 cited items (range= 1–403) (Fig. 1a). Cited references cover a median temporal span of  
90 45 years (0–922) (Fig. 1b). The mean proportion of recent papers in the reference lists is  
91 0.21 (0–1); the proportion of non-ISI articles is 0.12 (0–0.8), whereas the average impact  
92 factor of the papers cited in references lists is 4.9 (0–29.5) (Fig. 1). The mean proportion of  
93 self-citations is 0.07 (Fig. 1f) and the proportion of cited seminal papers is 0.006 (0–0.33)  
94 (Fig. 1g).

95 We predicted the expected curve of citations over article age with a Poisson  
96 generalized additive model (GAM). We observed a significant parabolic trend in the  
97 number of citations over time ( $F= 2724.8$ ;  $p< 0.001$ ), with number of citations reaching a  
98 plateau of ~4 after 10 years from publication (Fig. 1h, inset).

99

100

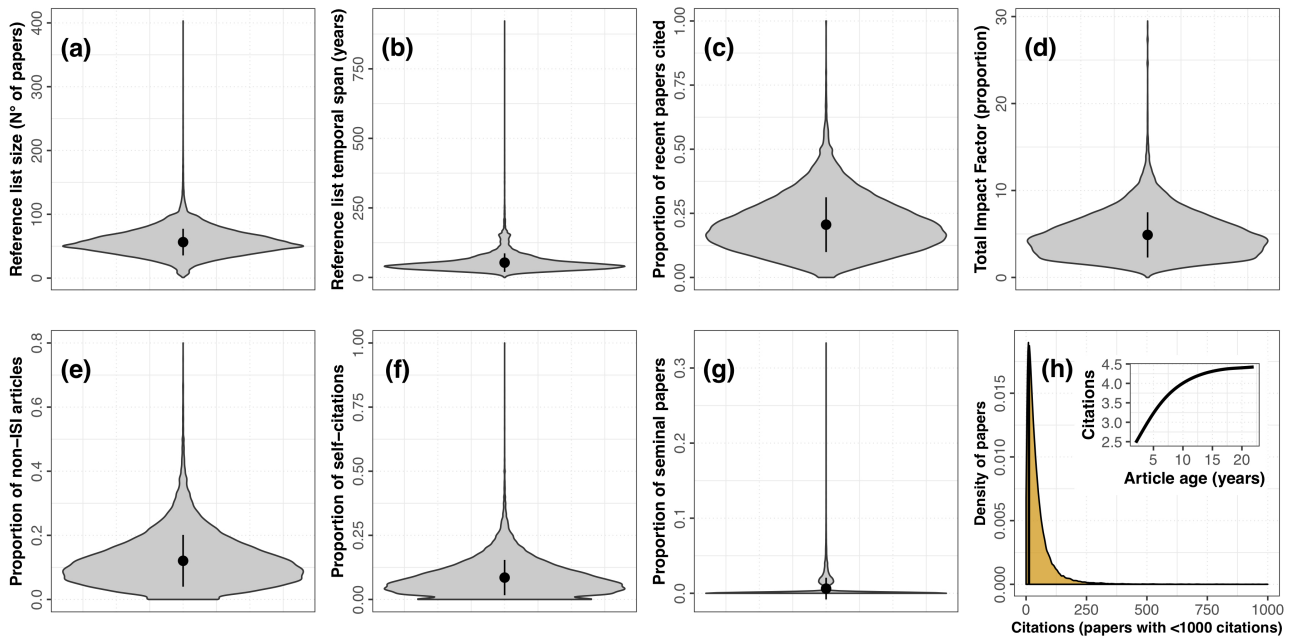

102 **Figure 1. Main numerical features of reference list of ecological journals. a–g)** Violin plots showing the  
103 distribution of the seven numerical properties of reference lists considered in this study. For each graph,  
104 black dot and vertical bar is mean  $\pm$  s.d. **h)** Distribution of citations among the articles considered in this  
105 study. Inset show the predicted relationship between citations and articles age, based on the prediction of a  
106 generalized additive model.

107

108 *Relationship between reference list features and article impact*

109

110 To normalized the number of citations for each article by its age, we expressed citations as  
111 the Pearson residuals from the regression curve shown in Fig. 1h (inset). We modeled  
112 residuals of citations as a function of the different features of the reference list, using a  
113 linear mixed effects model with journal identity and publication year as random factors.

114 We observed a positive and significant relationship between citations of a paper  
115 and the number of cited references (Estimated  $\beta \pm$  s.e.  $3.11 \pm 0.12$   $p < 0.001$ ), with articles  
116 with longer reference lists accumulating more citations over time (Fig. 2a). The number of  
117 citations also significantly increased with an increase in the proportion of self-citations  
118 (Estimated  $\beta \pm$  s.e.:  $3.45 \pm 0.34$ ,  $p < 0.001$ ; Fig. 2b) and reference list total Impact Factor (IF)  
119 (Estimated  $\beta \pm$  s.e.:  $0.99 \pm 0.12$ ,  $p < 0.001$ ; Fig. 2d). Furthermore, we found a positive  
120 relationship between citations and immediacy of the reference list, namely articles citing a  
121 greater proportion of recent papers accumulated more citations over time (Estimated  $\beta \pm$   
122 s.e.:  $11.28 \pm 0.39$ ,  $p < 0.001$ ; Fig. 2c). Proportion of non-ISI journal article referenced, total  
123 temporal span of the reference list, and proportion of cited seminal papers had no  
124 significant effect on citations (non-ISI Estimated  $\beta \pm$  s.e.:  $-0.22 \pm 0.39$ ,  $p = 0.554$ ; Temporal  
125 span:  $-0.13 \pm 0.35$ ,  $p = 0.164$ ; Seminality:  $0.46 \pm 0.644$ ,  $p = 0.470$ ).



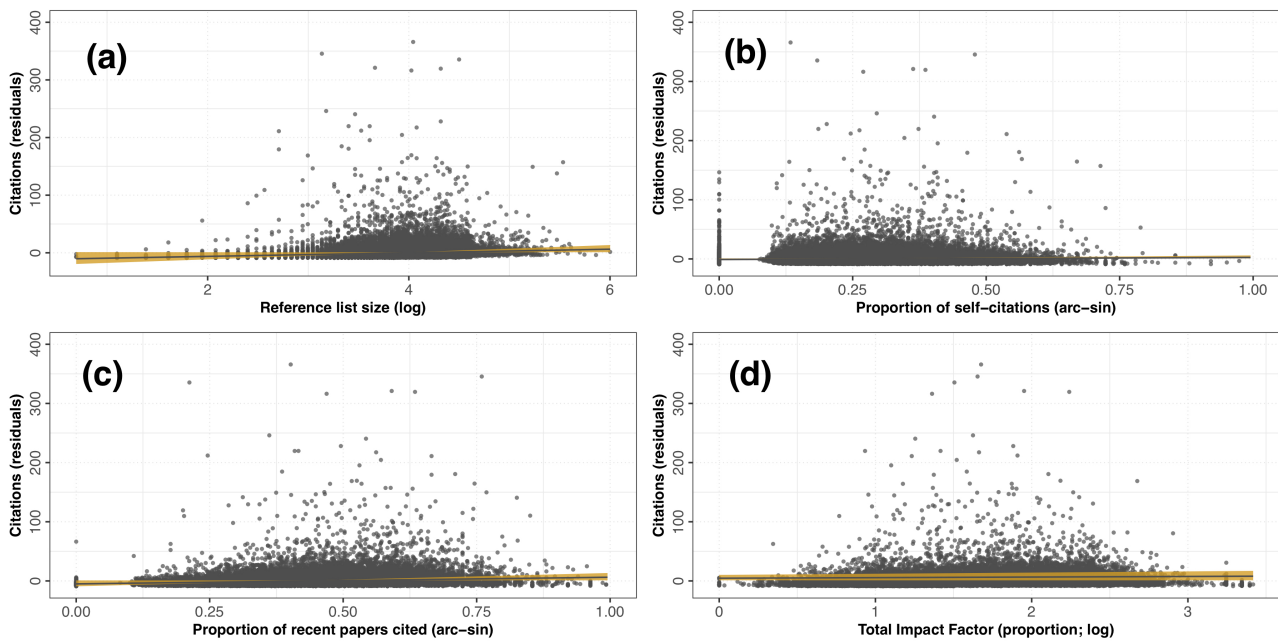

128 **Figure 2. Relationships between articles citation and reference lists numerical properties.** Predicted  
129 relationships (filled lines) and 95% confidence intervals (orange surfaces) between the residuals of citation  
130 over articles' age and **a)** length of the reference list, **b)** proportion of self-citation, **c)** proportion of recent  
131 papers cited, and **d)** total impact factor of the reference list, according to the Linear mixed models analysis.  
132 Variables are transformed to homogenize their distribution. Only fixed effects are shown.

133 *Temporal variations in reference list features*

134 Over the 20-years period considered (1997–2017), the total IF of the reference list steadily  
135 and significantly increased. The average ( $\pm$ s.d.) IF of articles cited in the reference list was  
136  $2.35\pm 1.83$  in 1997, and  $6.19\pm 2.23$  in 2017 (Fig. 3c). Yet, it is worth noting that over the 20-  
137 years period considered the overall IF of scientific journals also significantly increased, a  
138 feature that may have inflated this trend<sup>19</sup>. In parallel, the proportion of non-journal articles  
139 referenced significantly decreased over time. In 1997, on average, non-journal articles  
140 accounted for 14% of the reference list, while this value dropped to 8% in 2017 (Fig. 3b).  
141 We also observed that the number of cited items in the reference list steadily increased  
142 from an average of  $45.3\pm 20.5$  in 1997 to  $68.2\pm 25.5$  in 2017 (Fig. 3a). We observed stabler  
143 trends for the temporal span of the reference list (Fig. 3d), proportion of self citations (Fig.  
144 3e), recent papers (Fig. 3f), and seminal papers (Fig. 3g). Models estimated parameters  
145 are in Fig. 3.

146

147

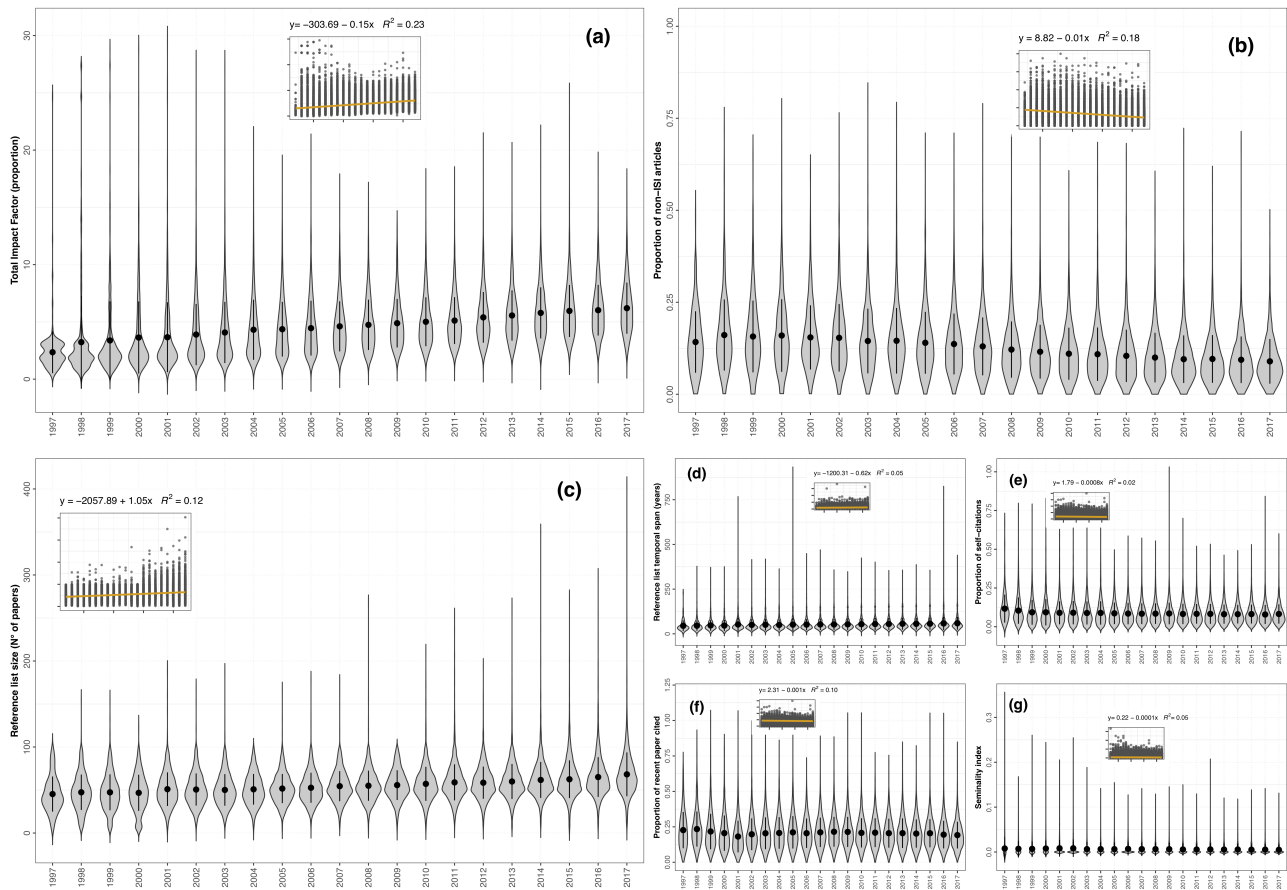

149 **Figure 3.** Variations in reference lists numerical properties between 1997 and 2017. a–g) Violin plots  
 150 showing the annual variations in the seven numerical features of reference lists. Insets show the predicted  
 151 relationships (filled line) and 95% confidence intervals (orange surfaces) based on linear mixed models.  
 152 Larger graph (a–c) illustrate non-flat temporal trends. Only fixed effects are shown.

## 153 **Discussion**

154 We showed that, on average, papers with longer reference lists are more cited across the  
155 ecological literature than papers with shorter reference lists, a result that parallels findings  
156 of previous studies <sup>7,9</sup>. One explanation is that longer reference lists may make papers  
157 more visible in online searches. Also, it was hypothesized that papers with longer  
158 reference lists may address a greater diversity of ideas and topics <sup>7</sup>, thus containing more  
159 citable information. Furthermore, a longer reference list may attract *tit-for-tat* citations, that  
160 is, the tendency of cited authors to cite the papers that cited them <sup>20</sup>. It is interesting to  
161 emphasize that this result directly questions the practice of most journals to set a  
162 maximum in the number of citable references per manuscript. Since most journals are  
163 switching to online-only publishing systems where space limitation is not an issue, this  
164 limitation seems unjustified.

165 We also found that papers citing a greater proportion of recent articles and high-IF  
166 articles are, on average, more cited. Citing recent references generally implies that  
167 scientists are working on 'hot', timely eco-evolutionary topics. The latter frequently end up  
168 published in journals with greater impact factor, which on average attract a greater share  
169 of citations. A complementary explanation for this result may be searched for in the recent  
170 changes in academic publishing. It was pointed out that, since the volume of available  
171 scientific information in the Internet era is growing exponentially <sup>18,21</sup>, scientists are not  
172 anymore able to keep pace with relevant papers published every year about any given  
173 scientific topic. As a result, they often end up reading almost exclusively the latest 'hot'  
174 papers <sup>17,18</sup> while avoiding older literature <sup>9</sup>.

175 Furthermore, we found that papers including a greater proportion of self-citations  
176 are more highly cited. Given that excessive self-citations are usually despised and  
177 discouraged, this results may come at a surprise. On the one hand, it is true that self-  
178 citations are sometimes unjustified, used by authors as a way to increase their scientific

179 visibility and to boost their own citation metrics<sup>10</sup>. An irrelevant self-citation breaking the  
180 flow of a paragraph, such as this one<sup>22</sup>, is an instructive example of this behavior. On the  
181 other hand, self-citations are an integrant part of scientific progress, as they usually reflect  
182 the cumulative nature of individual research<sup>23</sup>. Indeed, 88% of the papers in our dataset  
183 included at least one self-citation. This may ultimately lead to accumulate more citations,  
184 because papers that are part of a bigger research line are often more visible and citable.

185 According to our analyses, other features of the reference list have not significant  
186 effect on citations. Probably, the least intuitive result is a lack of relationship between the  
187 number of cited seminal papers and the number of citations. The list of seminal papers  
188 was generated using the results of a recent expert-based opinion paper, providing a list of  
189 the 100 “must-read” articles in ecology<sup>17</sup>. A manuscript citing any of those classical papers  
190 should focus, on average, on broader and long-debate topics in ecology, and therefore it is  
191 expected to receive more citations. But this is not the case. If one assumes that the  
192 number of citations for a paper is an index of its importance for the field, such a result may  
193 question the “must-read” value of some of the articles included in Courchamp & Bradshaw  
194<sup>17</sup> compilation. However, most of these seminal papers are relatively old and they thus  
195 have inspired more recent studies, which may be cited instead of the original ones.

196

### 197 *Change in reference lists structures over time*

198 We observed significant changes in the structure of articles’ reference lists from 1997 to  
199 2017. We argue here that most of these changes are directly related to a shift in the  
200 academic publishing behaviors of the Internet era<sup>24</sup> from browsing paper in print to  
201 searching online through the use of hyperlinks<sup>9,15</sup>. While the volume of available scientific  
202 information has grown exponentially<sup>18</sup>, retrieving relevant bibliography has become  
203 simpler and quicker thanks to online searching tools<sup>15</sup>. This seemingly explain why, on  
204 average, the length of reference lists across ecological journals has steadily increased.

205           The last two decades have also seen an exponential rise in the use of journals  
206 metrics, especially the impact factor <sup>19</sup>, and the consequent desire of authors to publish in  
207 high-ranking journals and cite papers published therein. This may explain why we  
208 observed a significant increase in the total impact factor of reference lists over time.  
209 Concomitantly, there has been a reduction in the number of non-ISI publications cited in  
210 reference lists. In general, both these features are a direct product of the changes in  
211 academic publishing behaviors of the “publish or perish” era. More and more authors are  
212 now exploring new ways to maximize the impact of their publications <sup>25,26</sup>. Citing papers  
213 with higher impact factor and a lower proportion non-journal articles may be perceived as  
214 an effective way to achieve such goal.

215

## 216 **Concluding remarks**

217 While we are writing, identifying and citing the most relevant articles that provide the  
218 scientific foundation for our research questions is not trivial. Time is against us: most  
219 researchers are overloaded by academic duties and have busy schedules, preventing to  
220 read classic papers and keep up with the latest advances in the main and nearby fields of  
221 research. Memory failures, perhaps increased by the haste of finishing the manuscript in  
222 time, do not help either. Accordingly, reference lists are almost inevitably characterized by  
223 faulty citations, including incorrect references, quotation errors, and omitted relevant  
224 papers <sup>16</sup>. In a more cynical reasoning, May <sup>12</sup> even argued that omissions of relevant  
225 papers might be due to the simple fact that “[...] *the author selects citations to serve his*  
226 *scientific, political, and personal goals and not to describe his intellectual ancestry.*”

227           But once we accept that making the perfect reference list is not possible, three  
228 heuristic rules will help us getting close to it:

229           1) Size matters. Not only in terms of reference list, but also in the number of  
230 characters <sup>27,28</sup>. Investing extra resources into reading others research it improves

231 the scientific basis of the study while building argumentation links with relevant  
232 manuscripts, making the paper more visible and useful to peers.

233 2) Hotness. During the last twenty years we have seen the advent of the Internet and  
234 changes in the way information is found, read, and spread. Keep track of impactful  
235 latest research, even exploiting novel tools such as social media <sup>29</sup> and blogs <sup>30</sup>, is a  
236 crucial premise to produce highly citable science.

237 3) Narcisism. Not only self-citations directly increase the citations of past work, but  
238 they have been shown to improve chances of being cited by others <sup>10</sup>. Furthermore,  
239 the probability of self-citation increases with professional maturity in a given field of  
240 study, showing that that is a direct consequence of the cumulative nature of  
241 individual research <sup>23</sup>.

242

## 243 **Methods**

### 244 *Criteria for articles inclusion*

245 We extracted from WoS all primary research articles published in the ecological journals  
246 between 1997 and to 2017 (Table 2). The year 1997 was chosen because approximately  
247 around this date the use of impact factor (IF) started to grow exponentially <sup>19</sup>. We selected  
248 only those ecological journals covering more than 75% of the 20-years period considered,  
249 thus allowing to explore temporal trends with confidence. For example, *Nature Ecology*  
250 *and Evolution* (2016–ongoing) was excluded as it covered only 10% of this temporal  
251 interval. We selected exclusively primary research articles because review and opinion  
252 papers, methodological papers, corrections, and editorials may have atypical reference  
253 lists.

254 We generated seven descriptors of reference lists properties, and used these as  
255 variables in subsequent analyses. A description of each variable and the rationale for its  
256 construction are in Table 1. Note that most of the reference list descriptors are expressed

257 as proportions, in order to normalize variables to the number of papers cited in the  
258 reference list <sup>31</sup>.



**Table 2.** Journal selected for the analysis.

| <b>Journal name</b>                | <b>Initial year</b> | <b>Temporal span<br/>selected</b> | <b>Totale N° of<br/>articles</b> | <b>N° of primary research<br/>articles</b> |
|------------------------------------|---------------------|-----------------------------------|----------------------------------|--------------------------------------------|
| Acta Oecologica                    | 1983                | 1997–2017                         | 1,571                            | 1,408                                      |
| American Naturalist                | 1867                | 1997–2017                         | 3,417                            | 2,852                                      |
| Austral Ecology                    | 2000                | 2000–2017                         | 1,659                            | 1,434                                      |
| Ecography                          | 1978                | 1997–2017                         | 2,051                            | 1,743                                      |
| Ecological<br>Applications         | 1991                | 1997–2017                         | 3,641                            | 3,051                                      |
| Ecology                            | 1920                | 1997–2017                         | 6,584                            | 5,505                                      |
| Ecology Letters                    | 1998                | 1998–2017                         | 2,636                            | 2,098                                      |
| Functional Ecology                 | 1987                | 1997–2017                         | 2,889                            | 2,326                                      |
| Global Change<br>Biology           | 1995                | 1997–2017                         | 4,573                            | 3,937                                      |
| Global Ecology and<br>Biogeography | 1993                | 1997–2017                         | 1,570                            | 1,377                                      |
| Journal of Animal<br>Ecology       | 1932                | 1997–2017                         | 2,639                            | 2,250                                      |
| Journal of Applied<br>Ecology      | 1964                | 1997–2017                         | 2,993                            | 2,407                                      |
| Journal of<br>Biogeography         | 1974                | 1997–2017                         | 3,541                            | 2,852                                      |
| Journal of Ecology                 | 1913                | 1997–2017                         | 2,603                            | 2,170                                      |
| Molecular Ecology                  | 1992                | 1997–2017                         | 7,853                            | 6,209                                      |
| Oecologia                          | 1968                | 1997–2017                         | 6,417                            | 5,446                                      |
| Oikos                              | 1949                | 1997–2017                         | 4,687                            | 3,812                                      |

262 *Relationship between citations and reference list characteristics*

263 We conducted all analyses in R <sup>32</sup>. To test our first working hypotheses, we conducted  
264 regression-type analyses following the general protocol by Zuur & Ieno <sup>33</sup>. We initially  
265 explored our dataset following a standard protocol for data exploration <sup>34</sup>, whereby we: i)  
266 checked for outliers in the dependent and independent variables; ii) explored the  
267 homogeneity of variables distribution; and iii) explored collinearity among covariates based  
268 on pairwise Pearson correlations—threshold for collinearity set at  $|r| > 0.7$  <sup>35</sup>.

269 As a result of data exploration, we removed three outliers from articles citations,  
270 corresponding to three papers cited over 6,500 times in WoS. We homogenized the  
271 distribution of our explanatory variables by log-transforming reference list size and  
272 temporal span, and square-root arcsin transforming all proportional variables. We also  
273 observed that over 40% of the articles in our dataset were never cited (Fig. 1a), but since  
274 these represent “true zeros” <sup>36</sup> we didn’t apply zero-inflated models to infer citation patterns  
275 over time <sup>37</sup>. No collinearity was detected among the seven explanatory variables—all  $|r| <$   
276 0.7.

277 We used a Poisson generalized additive model (GAM) to predict the expected  
278 pattern of citations over article age, and expressed the number of citations as the Pearson  
279 residuals from the curve (Fig. 1a). To test which reference list features correlate with  
280 residuals in number of citations, we generated a linear mixed effects model (LMM) by  
281 including journal identity and publication year as random terms to account for data non-  
282 independence. We fitted LMM with the R package “nlme” <sup>38</sup>, and validated models using  
283 residuals and fitted values <sup>33</sup>.

284

285 *Change in reference list characteristics over time*

286 We used LMMs to predict annual variations in reference list characteristics over time,  
287 including journal identity as a random factor. Seven LMMs were constructed, one for each  
288 variable described in Table 1. In these case, as the seven variables were included as  
289 dependent variables, we didn't log- and square-root arcsin transformed variables.

290

### 291 **Conflict of interest statement**

292 The authors declare no competing financial interests.

293

### 294 **Acknowledgements**

295 Thanks to Pedro Cardoso for a useful discussion.

296

### 297 **Author contributions**

298 SM conceived the study. SM and FC designed methodology. FC mined data from WoS.

299 SM and FC developed code for data processing. SM performed the analyses, with  
300 suggestions by FC, DF, and AM. SM wrote the first draft. All authors contributed to the  
301 writing of the manuscript through comments and additions.

302

303 **Data availability.** All data used to generate this study can be freely downloaded from Web  
304 Of Science. The cleaned database and R script to generate the analysis will be deposited  
305 in a public repository upon acceptance of the peer-review version of this paper.

306 **Literature cited**

- 307 1. Lawrence, S. Free online availability substantially increases a paper's impact. *Nature* **411**, 521  
308 (2001).
- 309 2. Gargouri, Y. *et al.* Self-Selected or Mandated, Open Access Increases Citation Impact for Higher  
310 Quality Research. *PLoS One* **5**, e13636 (2010).
- 311 3. Bowman, D. & Kinnan, S. Creating effective titles for your scientific publications. *VideoGIE* **39**, 260–  
312 261 (2018).
- 313 4. Fox, C. W. & Burns, C. S. The relationship between manuscript title structure and success: editorial  
314 decisions and citation performance for an ecological journal. *Ecol. Evol.* **5**, 1970–1980 (2015).
- 315 5. Murphy, S. M. *et al.* Does this title bug (Hemiptera) you? How to write a title that increases your  
316 citations. *Ecol. Entomol.* **44**, 593–600 (2019).
- 317 6. Letchford, A., Preis, T. & Moat, H. S. The advantage of simple paper abstracts. *J. Informetr.* **10**, 1–8  
318 (2016).
- 319 7. Fox, C. W., Paine, C. E. T. & Sauterey, B. Citations increase with manuscript length, author number,  
320 and references cited in ecology journals. *Ecol. Evol.* **6**, 7717–7726 (2016).
- 321 8. Fu, D. Y. & Hughey, J. J. Releasing a preprint is associated with more attention and citations for the  
322 peer reviewed article. *Elife* **8**, e52646 (2019).
- 323 9. Evans, J. A. Electronic Publication and the Narrowing of Science and Scholarship. *Science (80-. )*.  
324 **321**, 395 (2008).
- 325 10. Fowler, J. H. & Aksnes, D. W. Does self-citation pay? *Scientometrics* **72**, 427–437 (2007).
- 326 11. Amancio, D. R., Nunes, M. G. V., Oliveira, O. N. & da Costa, L. F. Using complex networks concepts  
327 to assess approaches for citations in scientific papers. *Scientometrics* **91**, 827–842 (2012).
- 328 12. May, K. O. Abuses of Citation Indexing. *Science (80-. )*. **156**, 890–892 (1967).
- 329 13. Von Bartheld, C. S., Collin, S. P. & Güntürkün, O. To Each Citation, a Purpose. *Science (80-. )*. **323**,  
330 36–37 (2009).
- 331 14. Larivière, V., Gingras, Y. & Archambault, É. The decline in the concentration of citations, 1900–2007.  
332 *J. Am. Soc. Inf. Sci. Technol.* **60**, 858–862 (2009).
- 333 15. Gingras, Y., Larivière, V. & Archambault, É. Literature Citations in the Internet Era. *Science (80-. )*.  
334 **323**, 36 (2009).
- 335 16. Wright, M. & Armstrong, S. J. The Ombudsman: Verification of Citations: Faulty Towers of  
336 Knowledge? *Interfaces (Providence)*. **38**, 125–139 (2011).
- 337 17. Courchamp, F. & Bradshaw, C. J. A. 100 articles every ecologist should read. *Nat. Ecol. Evol.* **2**, 395–  
338 401 (2018).
- 339 18. Landhuis, E. Scientific literature: information overload. *Nature* **535**, 457–458 (2016).
- 340 19. Archambault, É. & Larivière, V. History of the journal impact factor: Contingencies and consequences.  
341 *Scientometrics* **79**, 635–649 (2009).
- 342 20. Webster, G. D., Jonason, P. K. & Schember, T. O. Hot Topics and Popular Papers in Evolutionary  
343 Psychology: Analyses of Title Words and Citation Counts in *Evolution* and *Human Behavior*, 1979 –  
344 2008. *Evol. Psychol.* **7**, 147470490900700300 (2009).
- 345 21. Björk, B.-C. Have the “mega-journals” reached the limits to growth? *PeerJ* **3**, e981 (2015).

- 346 22. Mammola, S. On deepest caves, extreme habitats, and ecological superlatives. *Trends Ecol. Evol.*  
347 (2020). doi:<https://doi.org/10.1016/j.tree.2020.02.011>
- 348 23. Mishra, S., Fegley, B. D., Diesner, J. & Torvik, V. I. Self-citation is the hallmark of productive authors,  
349 of any gender. *PLoS One* **13**, e0195773 (2018).
- 350 24. Fire, M. & Guestrin, C. Over-optimization of academic publishing metrics: observing Goodhart's Law  
351 in action. *Gigascience* **8**, giz053 (2019).
- 352 25. Freeling, B., Doubleday, Z. A. & Connell, S. D. Opinion: How can we boost the impact of publications?  
353 Try better writing. *Proc. Natl. Acad. Sci.* **116**, 341–343 (2019).
- 354 26. Doubleday, Z. A. & Connell, S. D. Publishing with objective charisma: Breaking science's paradox.  
355 *Trends Ecol. Evol.* **32**, 803–805 (2017).
- 356 27. Elgendi, M. Characteristics of a highly cited article: A machine learning perspective. *IEEE Access* **7**,  
357 87977–87986 (2019).
- 358 28. Ball, P. A longer paper gathers more citations. *Nature* **455**, 274 (2008).
- 359 29. Thelwall, M., Haustein, S., Larivière, V. & Sugimoto, C. R. Do Altmetrics Work? Twitter and Ten Other  
360 Social Web Services. *PLoS One* **8**, e64841 (2013).
- 361 30. Saunders, M. E. *et al.* Bringing ecology blogging into the scientific fold: Measuring reach and impact  
362 of science community blogs. *R. Soc. Open Sci.* **4**, 170957 (2017).
- 363 31. Waltman, L. & van Eck, N. J. Field Normalization of Scientometric Indicators. in (2019).  
364 doi:10.1007/978-3-030-02511-3\_11
- 365 32. R Core Team. R: A Language and Environment for Statistical Computing. (2018).
- 366 33. Zuur, A. F. & Ieno, E. N. A protocol for conducting and presenting results of regression-type analyses.  
367 *Methods Ecol. Evol.* **7**, 636–645 (2016).
- 368 34. Zuur, A. F., Ieno, E. N. & Elphick, C. S. A protocol for data exploration to avoid common statistical  
369 problems. *Methods Ecol. Evol.* **1**, 3–14 (2009).
- 370 35. Dormann, C. F. *et al.* Collinearity: a review of methods to deal with it and a simulation study  
371 evaluating their performance. *Ecography (Cop.)*. **36**, 27–46 (2013).
- 372 36. Blasco-Moreno, A., Pérez-Casany, M., Puig, P., Morante, M. & Castells, E. What does a zero mean?  
373 Understanding false, random and structural zeros in ecology. *Methods Ecol. Evol.* **10**, 949–959  
374 (2019).
- 375 37. Zuur, A. F., Savaliev, A. A. & Ieno, E. N. *Zero Inflated Models and Generalized Linear Mixed Models*  
376 *with R*. (Highland Statistics Limited, 2012).
- 377 38. Pinheiro J, Bates D, DebRoy S, S. Linear and Nonlinear Mixed Effects Models. *R package version*  
378 *3.1-140* (2019). Available at: <https://cran.r-project.org/package=nlme>.

379

380

381

382

383
